# Supplementary material for: High-efficiency super-elastic liquid metal based triboelectric fibers and textiles
Source: PubMed Central journal article supplement (PMC7363815; doi:10.1038/s41467-020-17345-8), 2020-07-15
Supplement: 41467_2020_17345_MOESM1_ESM.pdf [file 41467_2020_17345_MOESM1_ESM.pdf]

## Supplementary Information

# High-efficiency Super-elastic Liquid Metal based Triboelectric Fibers and Textiles

Dong *et al.*

## Supplementary Figures

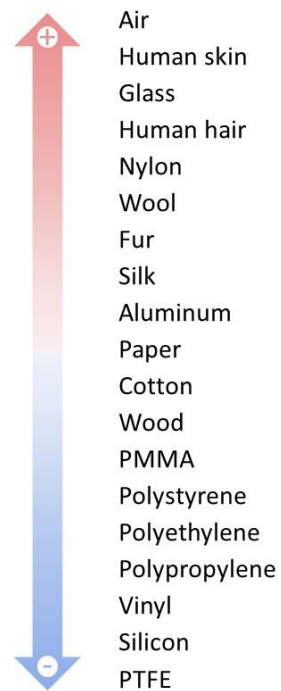

**Supplementary Figure 1. Triboelectric series of various materials.** “+” / “-” indicate whether a material tends to be positively or negatively charged when triboelectrification occurs.<sup>1,2</sup>

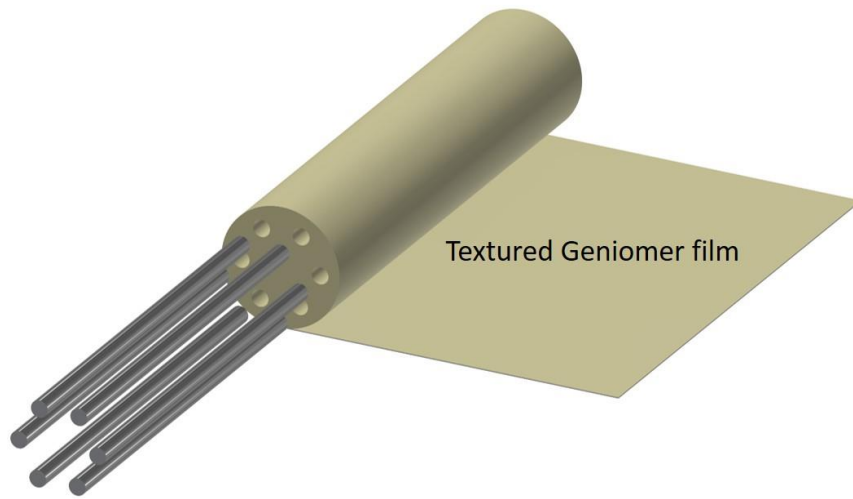

**Supplementary Figure 2. Schematic of the preform fabrication.** The preform integrates multiple channels and a microtextured surface.

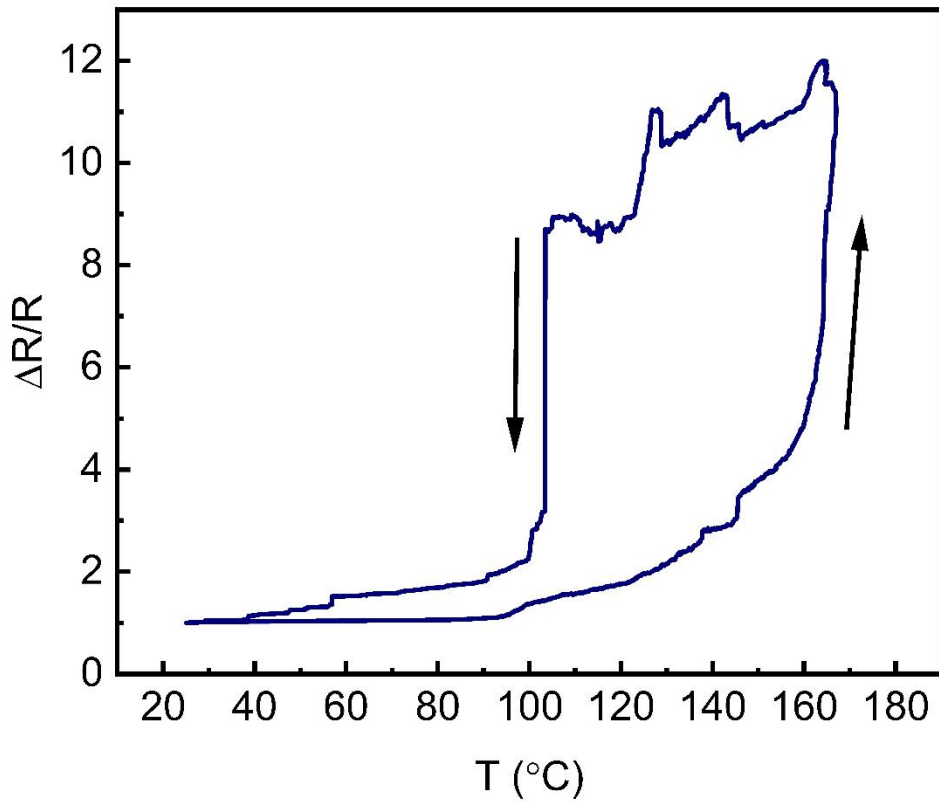

**Supplementary Figure 3. Resistance change of Galinstan as a function of temperature.**

The tested temperature ranges from 25 to 165 °C (the highest temperature that Geniomer experienced during drawing process is around 150 °C).

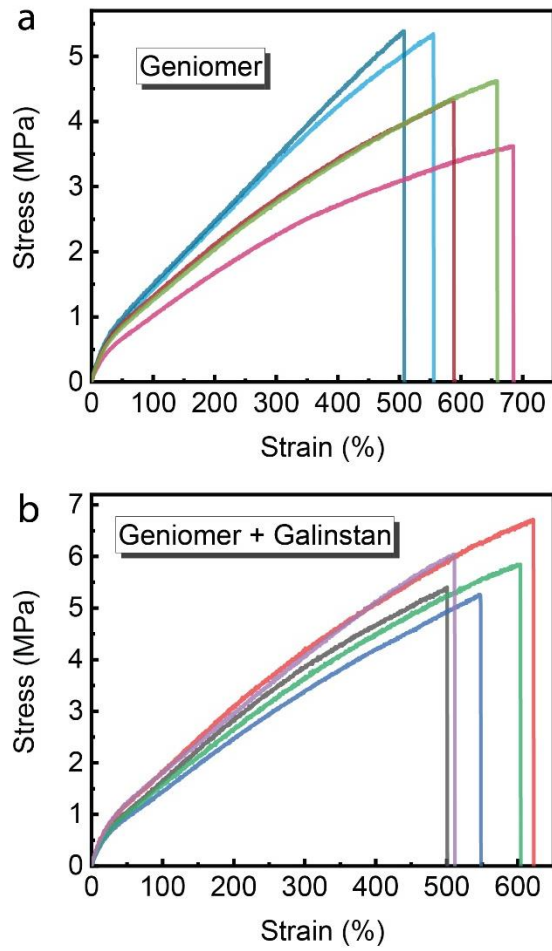

**Supplementary Figure 4. Stress-strain curves of fibers. a** Geniomer fibers without liquid metal. **b** Geniomer fibers with integrated liquid metal electrodes.

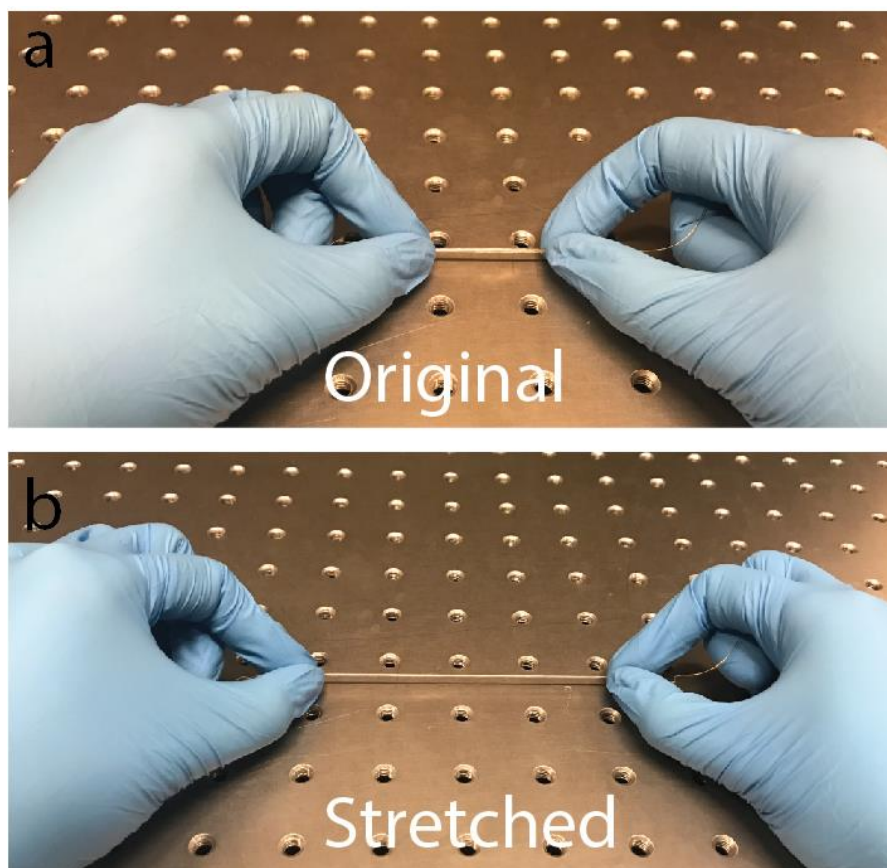

**Supplementary Figure 5. Photographs showing the stretchability of triboelectric fibers. a** A fiber with its original length. **b** The fiber being stretched to 400% strain.

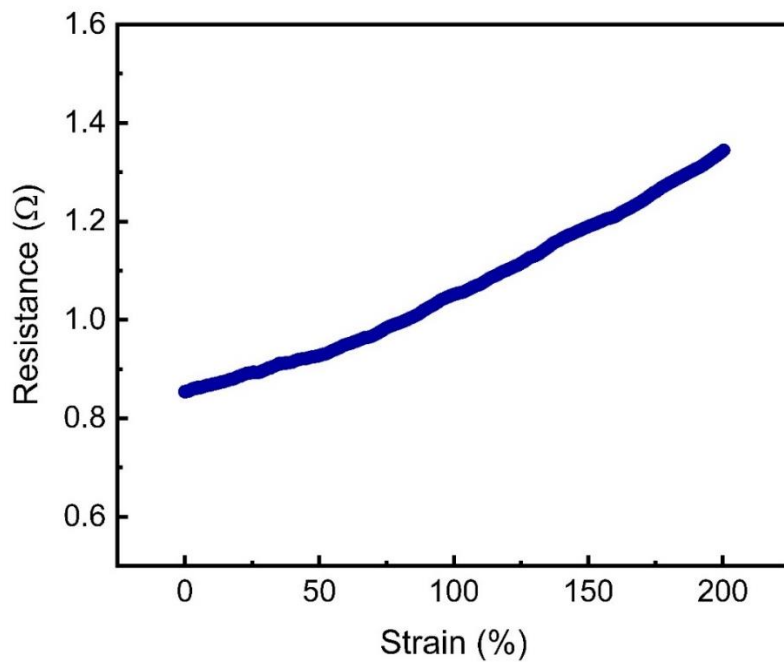

**Supplementary Figure 6. Resistance change versus strain of the triboelectric fiber.**

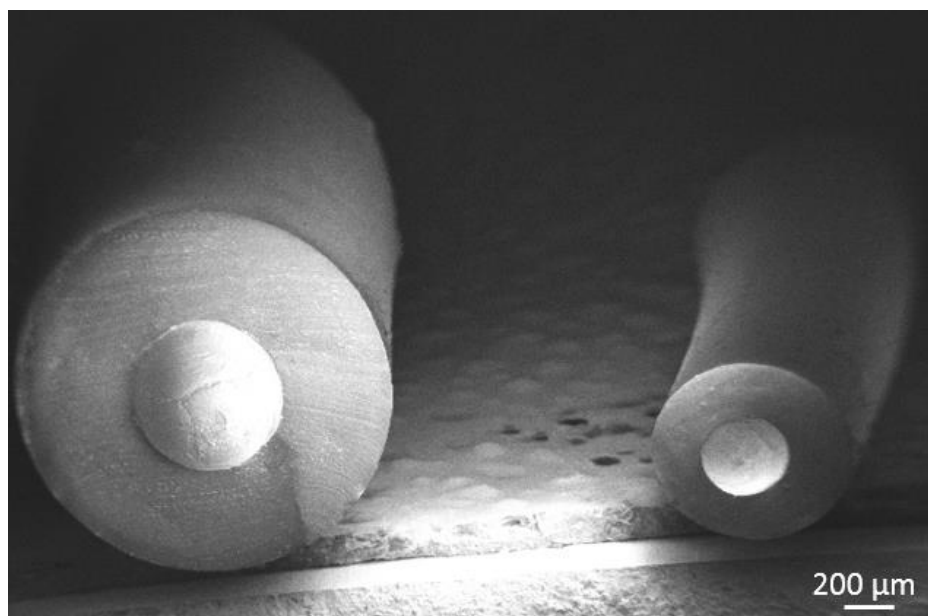

**Supplementary Figure 7. SEM image showing the fibers with tunable dimensions.**



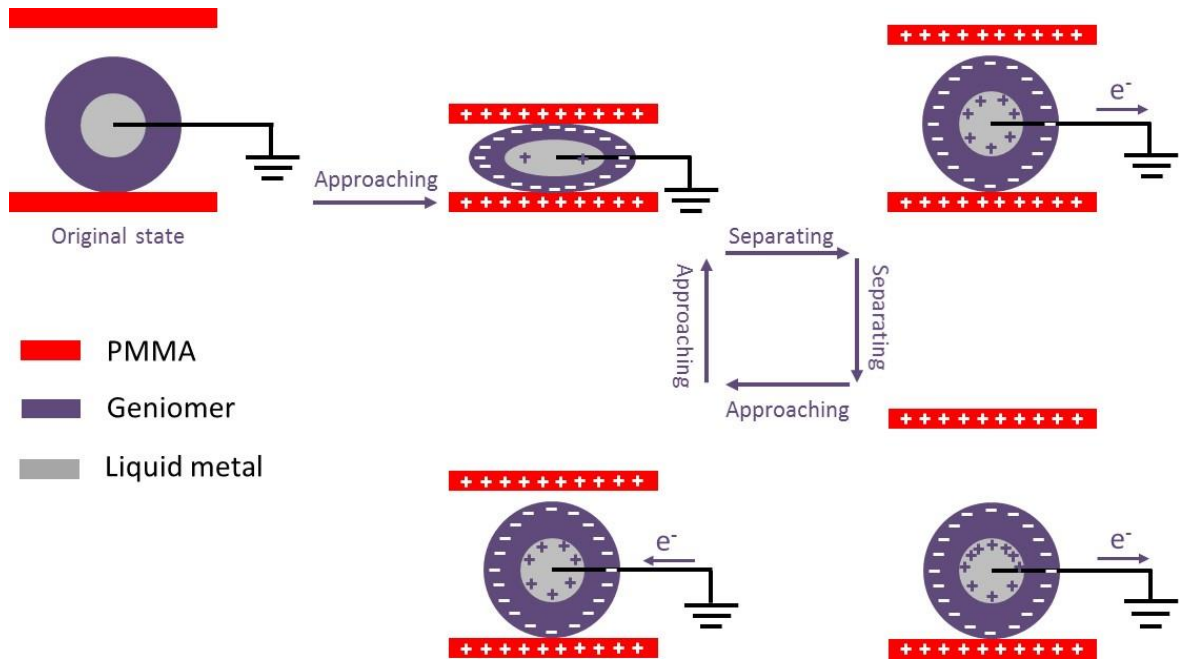

**Supplementary Figure 8. Charge distribution of a TENG fiber under short-circuit conditions.**

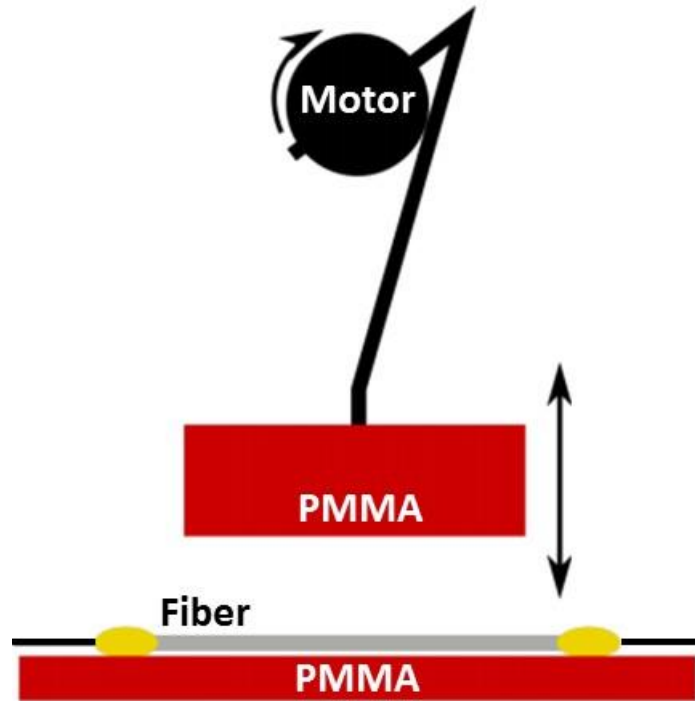

**Supplementary Figure 9. Schematic showing the custom fiber compression setup.** The length and width of upper PMMA sheet are 30 mm and 14 mm respectively, while the length and diameter of the tested fiber are 40 mm and 0.93 mm respectively. The maximum displacement distance of the PMMA sheet is 16 mm.

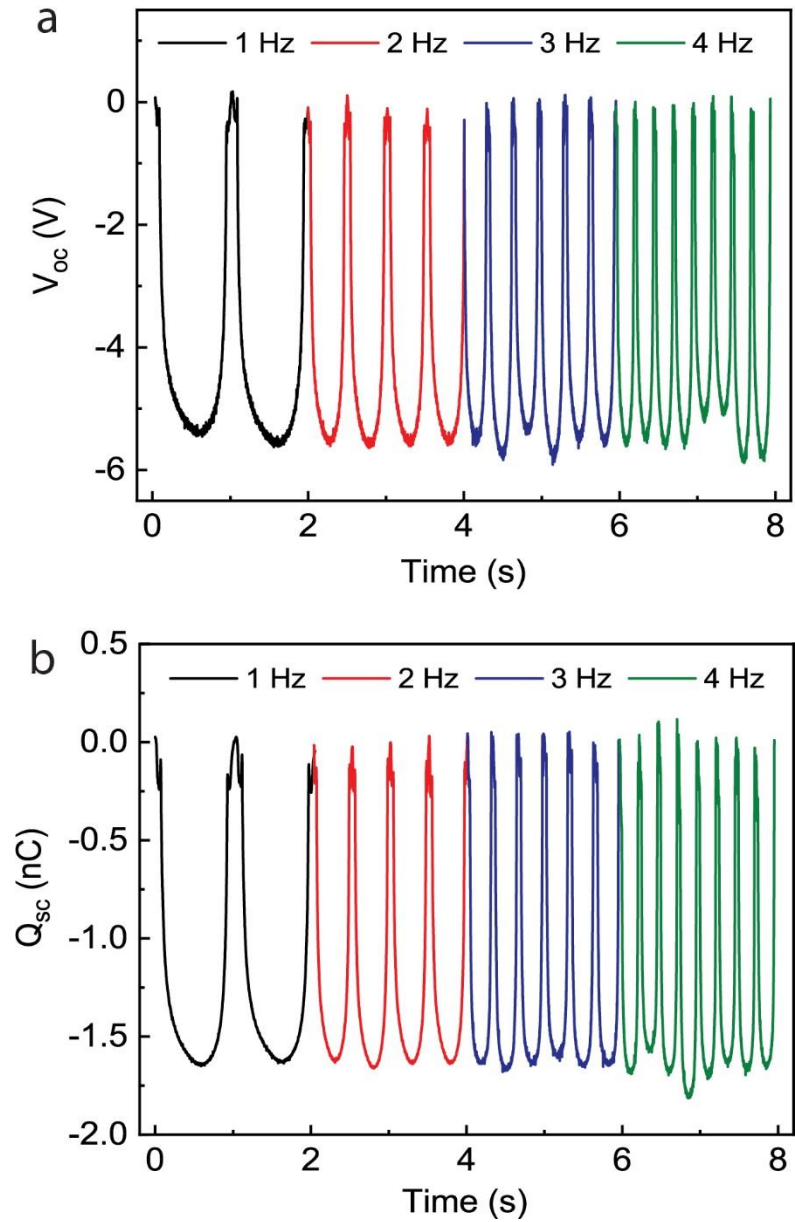

**Supplementary Figure 10. Typical electrical output signals by tapping a short fiber. a**  $V_{oc}$   
**b**  $Q_{sc}$  at various frequencies (effective contact length: 3 cm).

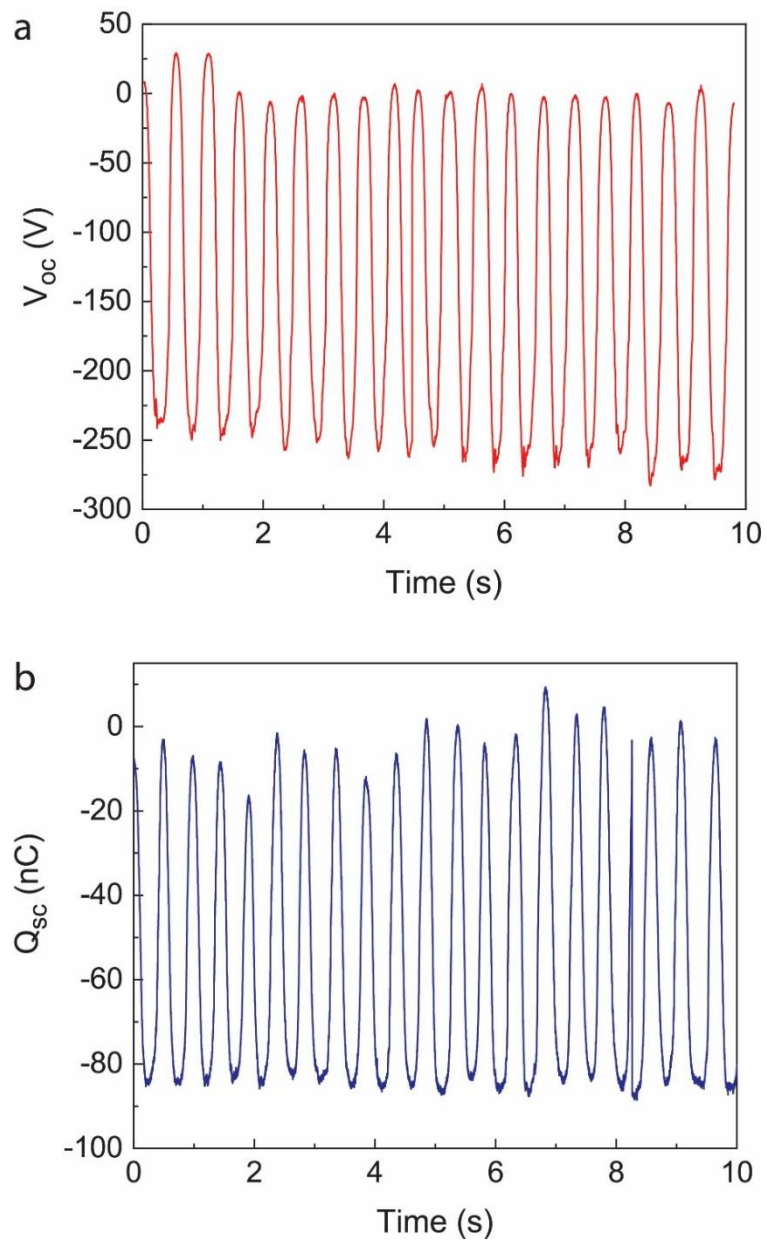

**Supplementary Figure 11. Hand-grasping triggered outputs of the TENG textile. a  $V_{oc}$  b  $Q_{sc}$ .**

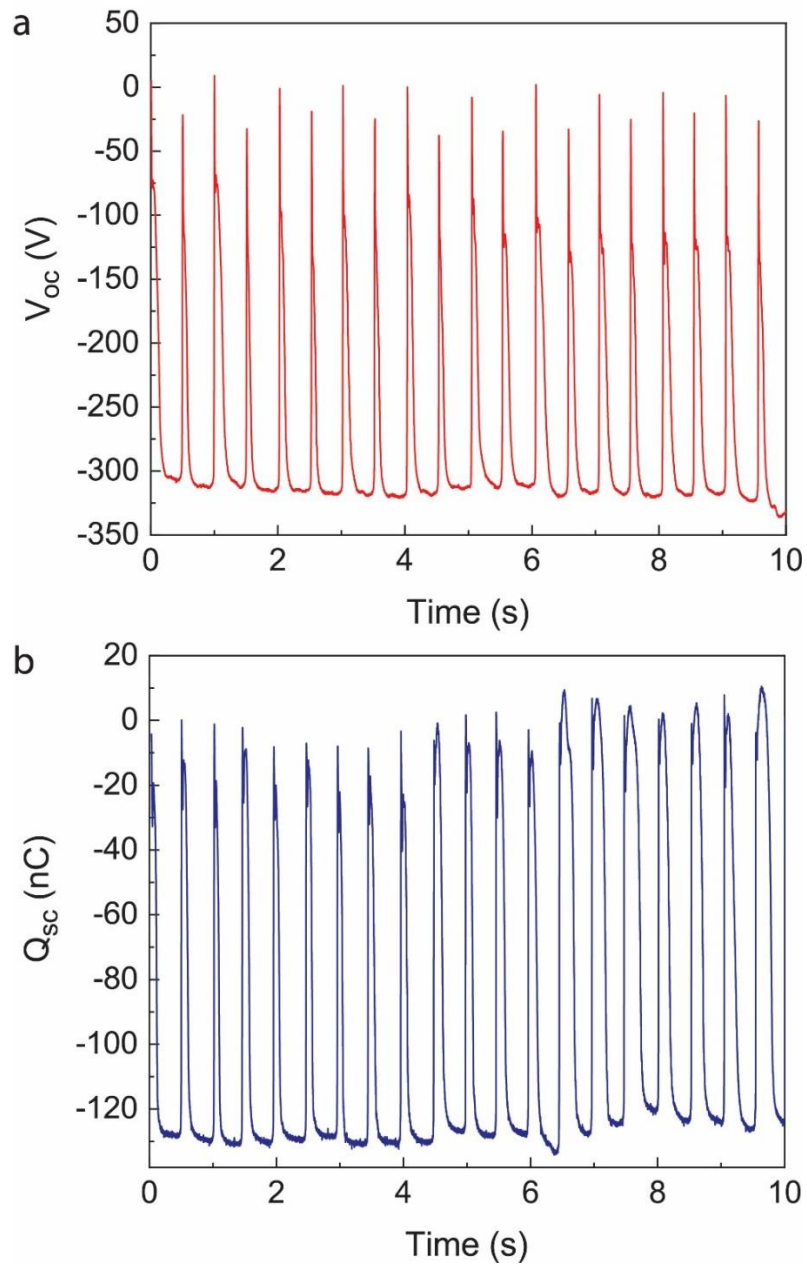

**Supplementary Figure 12. Hand-tapping triggered outputs of the TENG textile. a  $V_{oc}$  b  $Q_{sc}$ .**

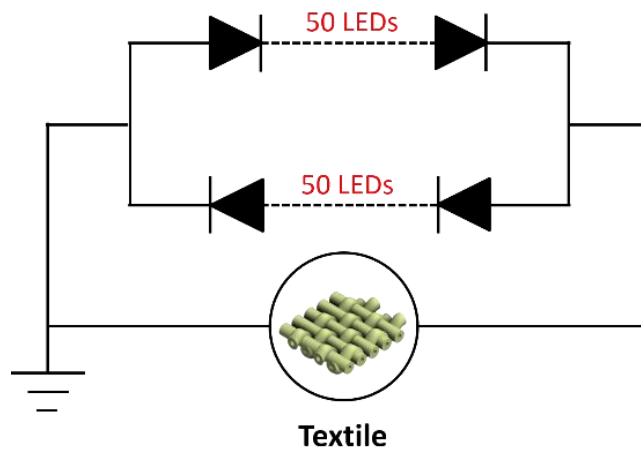

**Supplementary Figure 13. Electrical circuit diagram showing the textile as a direct power source to drive 100 LEDs.**

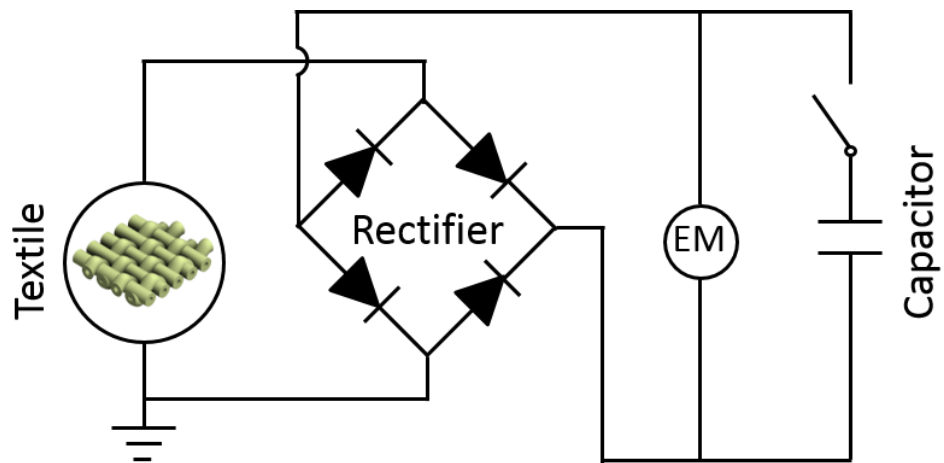

**Supplementary Figure 14. Electrical circuit diagram of the textile connected with a bridge rectifier to charge a capacitor.**

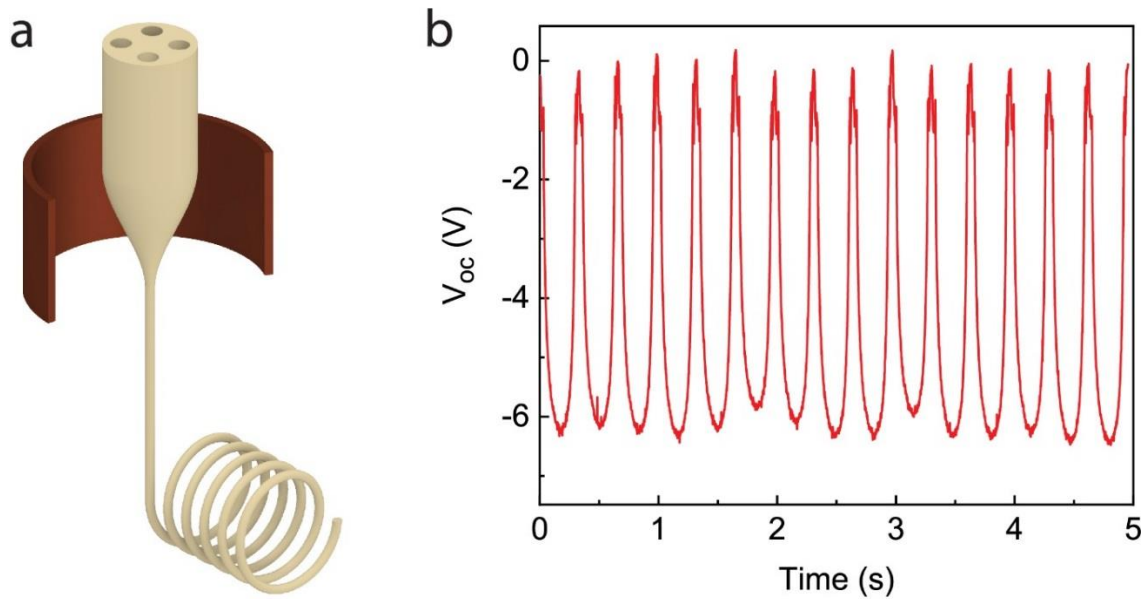

**Supplementary Figure 15. TENG fibers with multiple liquid metal electrodes.** **a** The flexibility of fiber design at the preform level enables the scalable fabrication of a complex fiber structure with multiple electrodes. **b** Output performance of such a fiber with the effective contact length of 3 cm.



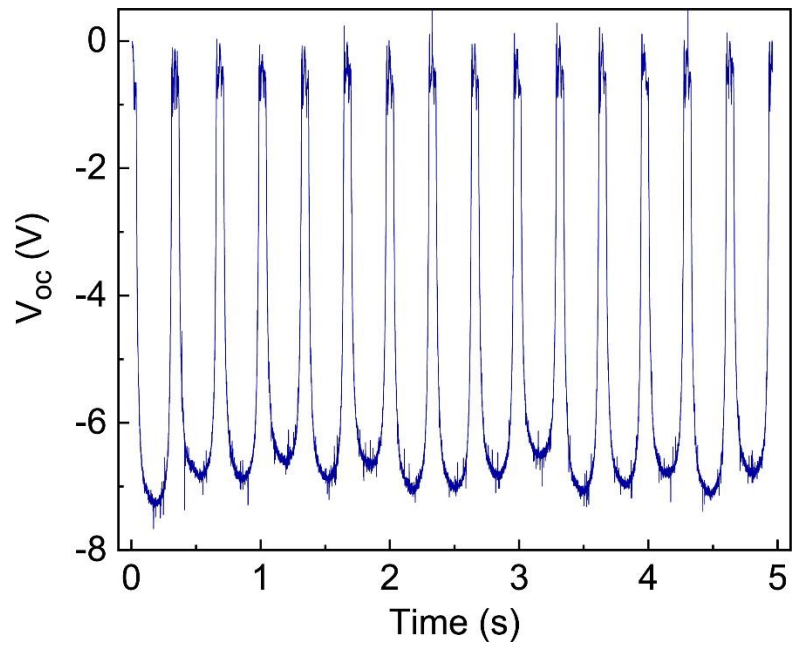

**Supplementary Figure 16. Open-circuit voltage of a 3 cm-long micro-textured fiber.**

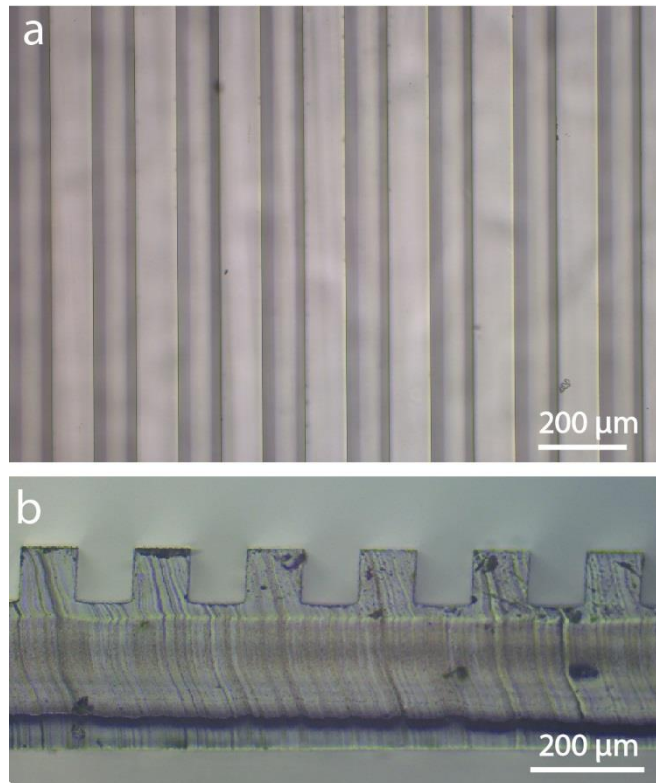

**Supplementary Figure 17. Textured Geniomer film for the fabrication of textured preforms.**

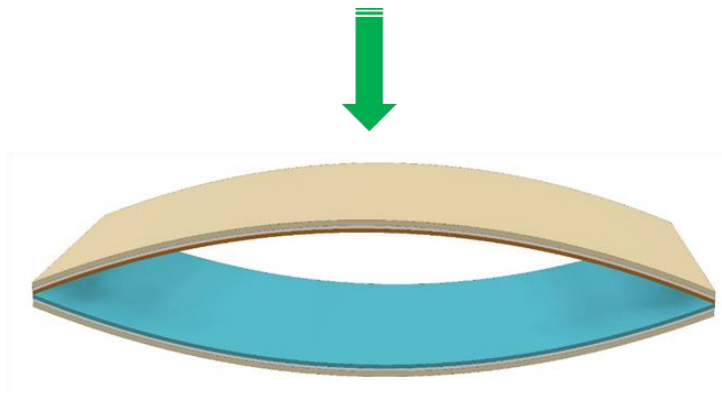

■ Polymer 1   ■ Polymer 2   ■ Al foil   ■ Carboard supporting

**Supplementary Figure 18. Schematic showing 2D planar TENG devices (contact-mode).** Such devices are used to determine relative triboelectric polarity of the tested polymers in this work.

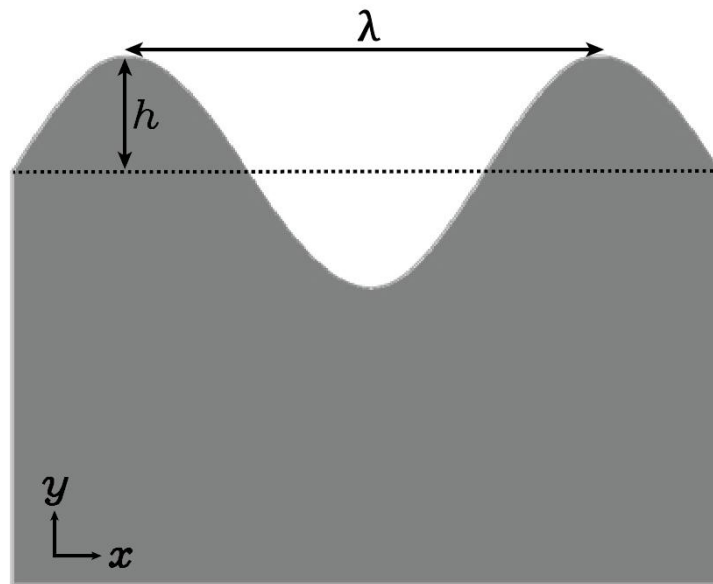

**Supplementary Figure 19. Schematic of a sinusoidal surface on a textured fiber with relevant parameters.**

## Supplementary Tables

**Supplementary Table 1.** Comparison of the electrical output performance of the triboelectric fiber with other reported fibers.

| Fiber length, diameter | Electrode materials               | Triboelectric surfaces           | Electrical output                    | Electrical output per volume                                                       | Trigger conditions         | Stretchability | Reference                                                                |
|------------------------|-----------------------------------|----------------------------------|--------------------------------------|------------------------------------------------------------------------------------|----------------------------|----------------|--------------------------------------------------------------------------|
| 3 cm, 0.93 mm          | Liquid metal                      | Geniomer//PMMA                   | 5.5 V<br>180 nA (4 Hz)<br>1.6 nC     | 269.9 V/cm <sup>3</sup><br>8.8 $\mu$ A/cm <sup>3</sup><br>78.5 nC/cm <sup>3</sup>  | Compression<br>2 N, 1.6 cm | 557%           | This work                                                                |
| 1.5 cm, 1.8 mm         | Stainless steel                   | PDMS//unknown external substrate | 4 V<br>0.7 $\mu$ A (2 Hz)<br>1.25 nC | 104.8 V/cm <sup>3</sup><br>18.3 $\mu$ A/cm <sup>3</sup><br>32.7 nC/cm <sup>3</sup> | Compression<br>2.5 cm      | « not given »  | Advanced Materials 29, 1702648 (2017) <sup>3</sup>                       |
| 2 cm, 6 mm             | Stainless steel                   | Silicone//acrylic                | 18 V<br>0.3 $\mu$ A (3 Hz)<br>6 nC   | 31.8 V/cm <sup>3</sup><br>0.5 $\mu$ A/cm <sup>3</sup><br>10.6 nC/cm <sup>3</sup>   | Compression<br>4 cm        | « not given »  | ACS Nano 11, 9490–9499 (2017) <sup>4</sup>                               |
| 10 cm, 2 mm            | Carbon fiber                      | Silicone//skin                   | 42.9 V<br>0.51 $\mu$ A (2.5 Hz)      | 136.6 V/cm <sup>3</sup><br>1.6 $\mu$ A/cm <sup>3</sup>                             | « not given »              | « not given »  | ACS Applied Materials and Interfaces 10, 42356–42362 (2018) <sup>5</sup> |
| 11 cm, 2.8 mm          | Metal wire, Ag NW                 | Nylon//silicone                  | 4.16 V                               | 6.1 V/cm <sup>3</sup>                                                              | Stretch 68%                | 300%           | Nano Energy 39, 673–683 (2017) <sup>6</sup>                              |
| 30 cm, 1.8 mm          | Helical stainless steel           | Silicone//stainless steel        | 4.2 V                                | 5.5 V/cm <sup>3</sup>                                                              | Stretch 100%               | 200%           | Nature Communications 10, 1–8 (2019) <sup>7</sup>                        |
| 5 cm, ~2.5 mm          | Ag-coated nylon fiber, CNT sheets | Ag-coated Nylon yarn//PVDF-TrFE  | 24 mV<br>8 nA (10 Hz)<br>10 pC       | 0.098 V/cm <sup>3</sup><br>0.03 $\mu$ A/cm <sup>3</sup><br>0.04 nC/cm <sup>3</sup> | Stretch 50%                | 50%            | Scientific Reports 6, 35153 (2016) <sup>8</sup>                          |
| 4 cm, 1.6 mm           | Ag NW                             | PTFE//PDMS-Ag NW                 | 10 nA (2 Hz)                         | 0.12 $\mu$ A/cm <sup>3</sup>                                                       | Compression<br>0.16 N      | 50%            | Nano Energy 41, 511–518 (2017) <sup>9</sup>                              |
| 10 cm, 4 mm            | CNT, coiled Cu wire               | Silicone//Cu                     | 140 V<br>75 nA/cm (2 Hz)<br>5 nC/cm  | 111.4 V/cm <sup>3</sup><br>0.6 $\mu$ A/cm <sup>3</sup><br>39.8 nC/cm <sup>3</sup>  | Stretch 50%                | 100%           | Advanced Functional Materials 27, 1604378 (2017) <sup>10</sup>           |
| 2.5 cm, ~1 mm          | CNT                               | PMMA//PDMS                       | 1 V<br>150 nA (1 Hz)                 | 50.9 V/cm <sup>3</sup><br>7.6 $\mu$ A/cm <sup>3</sup>                              | Compression<br>10 N        | stretchable    | Journal of Materials Chemistry A 5, 6032–6037 (2017) <sup>11</sup>       |

**Supplementary Table 2.** Summary of the electrical output performance of the triboelectric textile in this work and other previously reported textiles.

| Textile dimension (cm*cm) | Contact area (cm*cm) | Applied force/pressure     | Electrode materials               | Triboelectric materials          | Electrical output                                              | Electrical output per area                                                  | reference                                                                |
|---------------------------|----------------------|----------------------------|-----------------------------------|----------------------------------|----------------------------------------------------------------|-----------------------------------------------------------------------------|--------------------------------------------------------------------------|
| 6*6                       | 6*6                  | 25.5 N<br>7.1 kPa          | Liquid metal                      | Geniomer//Nitrile                | 490 V<br>175 nC                                                | 13.6 V/cm <sup>2</sup><br>4.86 nC/cm <sup>2</sup>                           | This work                                                                |
| 10*10                     | « not given »        | « not given »              | Ag                                | Ag//PTFE                         | 23.5 V<br>1.05 μA                                              | 0.2 V/cm <sup>2</sup><br>0.01 μA/cm <sup>2</sup>                            | ACS Nano 11, 10733–10741 (2017) <sup>12</sup>                            |
| 16.5*11.4                 | « not given »        | « not given »              | Stainless steel thread            | Silicone//skin                   | 200 V<br>200 μA                                                | 1.06 V/cm <sup>2</sup><br>1.06 μA/cm <sup>2</sup>                           | Advanced Functional Materials 27, 1604462 (2017) <sup>13</sup>           |
| 5*10                      | 5*10                 | « not given »              | Ag fiber fabric                   | Nylon//polyester                 | 90 V<br>1 μA                                                   | 1.8 V/cm <sup>2</sup><br>0.02 μA/cm <sup>2</sup>                            | ACS Applied Materials and Interfaces 6, 14695–14701 (2014) <sup>14</sup> |
| 4*4                       | 4*4                  | 11 N<br>6.9 kPa            | Stainless steel                   | Silicone//acrylic                | 150V<br>2.9 μA (5Hz)<br>52 nC                                  | 9.4 V/cm <sup>2</sup><br>0.18 μA/cm <sup>2</sup><br>3.25 nC/cm <sup>2</sup> | ACS Nano 11, 9490–9499 (2017) <sup>4</sup>                               |
| 4.5*8                     | 4.5*8                | « not given »              | Stainless steel                   | Polyurethane//polyester          | 75 V<br>1.2 μA(1Hz)                                            | 2.1 V/cm <sup>2</sup><br>0.03 μA/cm <sup>2</sup>                            | ACS Nano 11, 12764–12771 (2017) <sup>15</sup>                            |
| 4.0*4.5                   | 1.5*1.5              | « not given »              | Stainless steel                   | PDMS//unknown external substrate | 20 V<br>0.1 μA (5Hz)<br>7 nC<br>(data of one-dielectric-layer) | 8.9 V/cm <sup>2</sup><br>0.04 μA/cm <sup>2</sup><br>3.1 nC/cm <sup>2</sup>  | Advanced Materials 29, 1702648 (2017) <sup>3</sup>                       |
| 10*10                     | 10*10                | « not given »              | Ni                                | Parylene//cotton                 | 40 V<br>5 μA (5Hz)                                             | 0.4 V/cm <sup>2</sup><br>0.05 μA/cm <sup>2</sup>                            | Advanced Materials 28, 98–105 (2016) <sup>16</sup>                       |
| 5*6                       | 5*6                  | « not given »              | Helical structure stainless steel | Silicone//stainless steel        | 31.8 V                                                         | 1.06 V/cm <sup>2</sup>                                                      | Nature Communications 10, 1–8 (2019) <sup>7</sup>                        |
| 1*1                       | 1*1                  | 9.8 N<br>98 kPa            | Al, conductive fabric             | Nylon//PVDF                      | 2 V<br>0.2 μA                                                  | 2 V/cm <sup>2</sup><br>0.2 μA/cm <sup>2</sup>                               | Journal of Materials Chemistry A 6, 22879–22888 (2018) <sup>17</sup>     |
| 6*6 (circle)              | 6*6 (circle)         | 10 to 20 N<br>3.5 to 7 kPa | Al foil                           | PVA/Mxene//silk fibroin          | 118.4 V (10 Hz)                                                | 4.2 V/cm <sup>2</sup>                                                       | Nano Energy 59, 268–276 (2019) <sup>18</sup>                             |
| 4*4                       | « not given »        | « not given »              | Cu                                | PTFE//Cu                         | 70 V<br>50 μA                                                  | 4.4 V/cm <sup>2</sup><br>3.12 μA/cm <sup>2</sup>                            | Nature Energy 1, 16138 (2016) <sup>19</sup>                              |
| 5*5                       | 5*5                  | 10 N<br>4 kPa              | PEDOT:PSS coated textile, Al      | PEDOT:PSS coated textile//PTFE   | 49.7 V<br>0.787 μA                                             | 2 V/cm <sup>2</sup><br>0.03 μA/cm <sup>2</sup>                              | Nano Energy 57, 338–352 (2019) <sup>20</sup>                             |
| 4*4                       | 4*4                  | 10 N<br>6.25 kPa           | Conductive fabric                 | PVDF/PTFE//skin                  | 112.7 V<br>1.98 μA                                             | 7 V/cm <sup>2</sup><br>0.12 μA/cm <sup>2</sup>                              | Nano Energy 58, 750–758 (2019) <sup>21</sup>                             |
| 6*4                       | 6*4                  | « not given »              | Cu                                | Cu//polyimide                    | 4.98 V<br>15.5 mA/m <sup>2</sup>                               | 0.2 V/cm <sup>2</sup><br>1.55 μA/cm <sup>2</sup>                            | Advanced Materials 28, 10267–10274 (2016) <sup>22</sup>                  |
| 5*5                       | 5*5                  | « not given »              | Ni cloth                          | Parylene//Ni                     | 50 V<br>4 μA                                                   | 2 V/cm <sup>2</sup><br>0.16 μA/cm <sup>2</sup>                              | Advanced Materials 27, 2472–2478 (2015) <sup>23</sup>                    |
| 10*10                     | 10*10                | 1400 N<br>140 kPa          | Cu sheet                          | Cu//PDMS                         | ~195 V                                                         | 1.95 V/cm <sup>2</sup>                                                      | Nano Energy 58, 365–374 (2019) <sup>24</sup>                             |
| 5.3*2.9                   | 5.3*2.9              | « not given »              | Liquid metal                      | Silicone                         | ~120 V                                                         | 7.8 V/cm <sup>2</sup>                                                       | ACS nano 12, 2027–2034 (2018) <sup>25</sup>                              |
| 5*5                       | 5*5                  | 300 N<br>120 kPa           | Ni                                | Silicon rubber, Ni//skin         | 300 V<br>30 μA                                                 | 12 V/cm <sup>2</sup><br>1.2 μA/cm <sup>2</sup>                              | Nano Energy 39, 562–570 (2017) <sup>26</sup>                             |

|      |         |                |                     |                                                  |                     |                                                                 |                                                        |
|------|---------|----------------|---------------------|--------------------------------------------------|---------------------|-----------------------------------------------------------------|--------------------------------------------------------|
| 3*3  | 1.5*1.5 | « not given »  | Au                  | Water//HCOENP                                    | 15 V<br>4 $\mu$ A   | 6.7 V/cm <sup>2</sup><br>1.8 $\mu$ A/cm <sup>2</sup>            | Advanced Energy Materials 7, 1–10 (2017) <sup>27</sup> |
| 6*5  | 6*5     | « not given »  | Carbon wire         | PTFE//carbon wire                                | ~175 V<br>8 $\mu$ A | 5.8 V/cm <sup>2</sup><br>0.27 $\mu$ A/cm <sup>2</sup>           | Nano Energy 50, 536–543 (2018) <sup>28</sup>           |
| 5*5  | 5*5     | 1 N<br>0.4 kPa | Ag                  | PET//silicone                                    | 45 V                | 1.8 V/cm <sup>2</sup>                                           | Materials Today 32, 84–93 (2019) <sup>29</sup>         |
| 7*7  | 7*7     | 5 N<br>1 kPa   | Ag flake/<br>PDMS   | Skin//HCOENPs/B<br>P/PET                         | 350 V               | 7.1 V/cm <sup>2</sup><br>0.65 $\mu$ A/cm <sup>2</sup> (2<br>Hz) | Nature Communications 9, 1–9 (2018) <sup>30</sup>      |
| 9*10 | 9*10    | « not given »  | Ag-coated<br>fabric | PTFE//cotton<br>yarn/Ag (free-<br>standing mode) | 900 V<br>19 $\mu$ A | 10 V/cm <sup>2</sup><br>0.21 $\mu$ A/cm <sup>2</sup>            | Nano Energy 58, 375–383 (2019) <sup>31</sup>           |

Note: The calculation of electrical contact per area is calculated based on the contact area provided it is known. As for the devices with unknown contact area, the calculation is based on the textile dimension.

## Supplementary Note 1

### *Discussion on the surface area enhancement of micro-textured fibers*

Compared with its original shape at the preform level (Supplementary Figure 17), the periodic texture was well maintained on the fiber, despite slight structural smoothing. Based on the cross-section of the fiber, it is reasonable to approximate that the texture can be expressed by a sinusoidal function  $y(x) = h\sin(\frac{2\pi}{\lambda}x)$ , where  $h$  and  $\lambda$  are the amplitude and period of the perturbation respectively (Supplementary Figure 19). According to the original dimensional design in the preform,  $h$  is estimated to be  $\frac{\lambda}{4}$ . We compare the surface area of a sinusoidal patterned fiber with a smooth surface fiber in the range of one period, under the assumption that they have the same fiber length and cross-sectional diameter. We assume that the surface area enhancement is represented by  $\frac{s-\lambda}{\lambda}$ , where  $s$  is the arc length of the sine function over one period  $\lambda$ , which equals to  $\int_0^\lambda \sqrt{1 + y'^2(x)} dx$ . The calculated surface area enhancement is 46%, which results in outputs with similar enhancement if the triboelectric surfaces are in full contact under external stimuli.



## Supplementary References

1. Diaz, A. F. & Felix-Navarro, R. M. A semi-quantitative tribo-electric series for polymeric materials: the influence of chemical structure and properties. *J. Electrostat.* **62**, 277–290 (2004).
2. Wang, Z. L. Triboelectric Nanogenerators as New Energy Technology for Self-Powered Systems and as Active Mechanical and Chemical Sensors. *ACS Nano* **7**, 9533–9557 (2013).
3. Dong, K. *et al.* 3D Orthogonal Woven Triboelectric Nanogenerator for Effective Biomechanical Energy Harvesting and as Self-Powered Active Motion Sensors. *Adv. Mater.* **29**, 1702648 (2017).
4. Dong, K. *et al.* A Highly Stretchable and Washable All-Yarn-Based Self-Charging Knitting Power Textile Composed of Fiber Triboelectric Nanogenerators and Supercapacitors. *ACS Nano* **11**, 9490–9499 (2017).
5. Yang, Y. *et al.* Coaxial Triboelectric Nanogenerator and Supercapacitor Fiber-Based Self-Charging Power Fabric. *ACS Appl. Mater. Interfaces* **10**, 42356–42362 (2018).
6. Gong, W. *et al.* A wearable, fibroid, self-powered active kinematic sensor based on stretchable sheath-core structural triboelectric fibers. *Nano Energy* **39**, 673–683 (2017).
7. Gong, W. *et al.* Continuous and scalable manufacture of amphibious energy yarns and textiles. *Nat. Commun.* **10**, 1–8 (2019).
8. Sim, H. J. *et al.* Stretchable Triboelectric Fiber for Self-powered Kinematic Sensing Textile. *Sci. Rep.* **6**, 35153 (2016).
9. Cheng, Y. *et al.* A stretchable fiber nanogenerator for versatile mechanical energy harvesting and self-powered full-range personal healthcare monitoring. *Nano Energy* **41**, 511–518 (2017).
10. He, X. *et al.* A Highly Stretchable Fiber-Based Triboelectric Nanogenerator for Self-Powered Wearable Electronics. *Adv. Funct. Mater.* **27**, 1604378 (2017).
11. Yu, X. *et al.* A coaxial triboelectric nanogenerator fiber for energy harvesting and sensing under deformation. *J. Mater. Chem. A* **5**, 6032–6037 (2017).

12. Kwak, S. S. *et al.* Fully Stretchable Textile Triboelectric Nanogenerator with Knitted Fabric Structures. *ACS Nano* **11**, 10733–10741 (2017).
13. Lai, Y.-C. *et al.* Single-Thread-Based Wearable and Highly Stretchable Triboelectric Nanogenerators and Their Applications in Cloth-Based Self-Powered Human-Interactive and Biomedical Sensing. *Adv. Funct. Mater.* **27**, 1604462 (2017).
14. Zhou, T. *et al.* Woven structured triboelectric nanogenerator for wearable devices. *ACS Appl. Mater. Interfaces* **6**, 14695–14701 (2014).
15. Yu, A. *et al.* Core-Shell-Yarn-Based Triboelectric Nanogenerator Textiles as Power Cloths. *ACS Nano* **11**, 12764–12771 (2017).
16. Pu, X. *et al.* Wearable Self-Charging Power Textile Based on Flexible Yarn Supercapacitors and Fabric Nanogenerators. *Adv. Mater.* **28**, 98–105 (2016).
17. Shin, Y. E. *et al.* Sewing machine stitching of polyvinylidene fluoride fibers: Programmable textile patterns for wearable triboelectric sensors. *J. Mater. Chem. A* **6**, 22879–22888 (2018).
18. Jiang, C. *et al.* All-electrospun flexible triboelectric nanogenerator based on metallic MXene nanosheets. *Nano Energy* **59**, 268–276 (2019).
19. Chen, J. *et al.* Micro-cable structured textile for simultaneously harvesting solar and mechanical energy. *Nat. Energy* **1**, 16138 (2016).
20. He, T. *et al.* Beyond energy harvesting - multi-functional triboelectric nanosensors on a textile. *Nano Energy* **57**, 338–352 (2019).
21. Qiu, Q. *et al.* Highly flexible, breathable, tailorable and washable power generation fabrics for wearable electronics. *Nano Energy* **58**, 750–758 (2019).
22. Zhao, Z. *et al.* Machine-Washable Textile Triboelectric Nanogenerators for Effective Human Respiratory Monitoring through Loom Weaving of Metallic Yarns. *Adv. Mater.* **28**, 10267–10274 (2016).
23. Pu, X. *et al.* A self-charging power unit by integration of a textile triboelectric nanogenerator and a flexible lithium-ion battery for wearable electronics. *Adv. Mater.* **27**, 2472–2478 (2015).

24. Gong, J. *et al.* Towards truly wearable energy harvesters with full structural integrity of fiber materials. *Nano Energy* **58**, 365–374 (2019).
25. Yang, Y. *et al.* Liquid-metal-based super-stretchable and structure-designable triboelectric nanogenerator for wearable electronics. *ACS nano* **12**, 2027–2034 (2018).
26. Tian, Z. *et al.* Performance-boosted triboelectric textile for harvesting human motion energy. *Nano Energy* **39**, 562–570 (2017).
27. Xiong, J. *et al.* Wearable All-Fabric-Based Triboelectric Generator for Water Energy Harvesting. *Adv. Energy Mater.* **7**, 1–10 (2017).
28. Chen, J. *et al.* Traditional weaving craft for one-piece self-charging power textile for wearable electronics. *Nano Energy* **50**, 536–543 (2018).
29. Chen, C. *et al.* 3D double-faced interlock fabric triboelectric nanogenerator for bio-motion energy harvesting and as self-powered stretching and 3D tactile sensors. *Mater. Today* **32**, 84–93 (2019).
30. Xiong, J. *et al.* Skin-touch-actuated textile-based triboelectric nanogenerator with black phosphorus for durable biomechanical energy harvesting. *Nat. Commun.* **9**, 1–9 (2018).
31. Huang, T. *et al.* Fabric texture design for boosting the performance of a knitted washable textile triboelectric nanogenerator as wearable power. *Nano Energy* **58**, 375–383 (2019).
