# Supplementary material for: High-efficiency super-elastic liquid metal based triboelectric fibers and textiles
Source: PubMed Central journal article supplement (PMC7363815; doi:10.1038/s41467-020-17345-8), 2020-07-15
Supplement: 41467_2020_17345_MOESM2_ESM.pdf [file 41467_2020_17345_MOESM2_ESM.pdf]

### **Description of Additional Supplementary Files**

File Name: Supplementary Movie 1

Description: A triboelectric textile that powers 100 LEDs.
